# Supplementary material for: Establishment of an immunogenic cell death-related model for prognostic prediction and identification of therapeutic targets in endometrial carcinoma
Source: Aging (Albany NY). 2024 Mar 8;16(5):4920–42. doi: 10.18632/aging.205647 (PMC10968672; doi:10.18632/aging.205647)
Supplement: Supplementary Figures [file aging-16-205647-s001.pdf]

SUPPLEMENTARY FIGURES

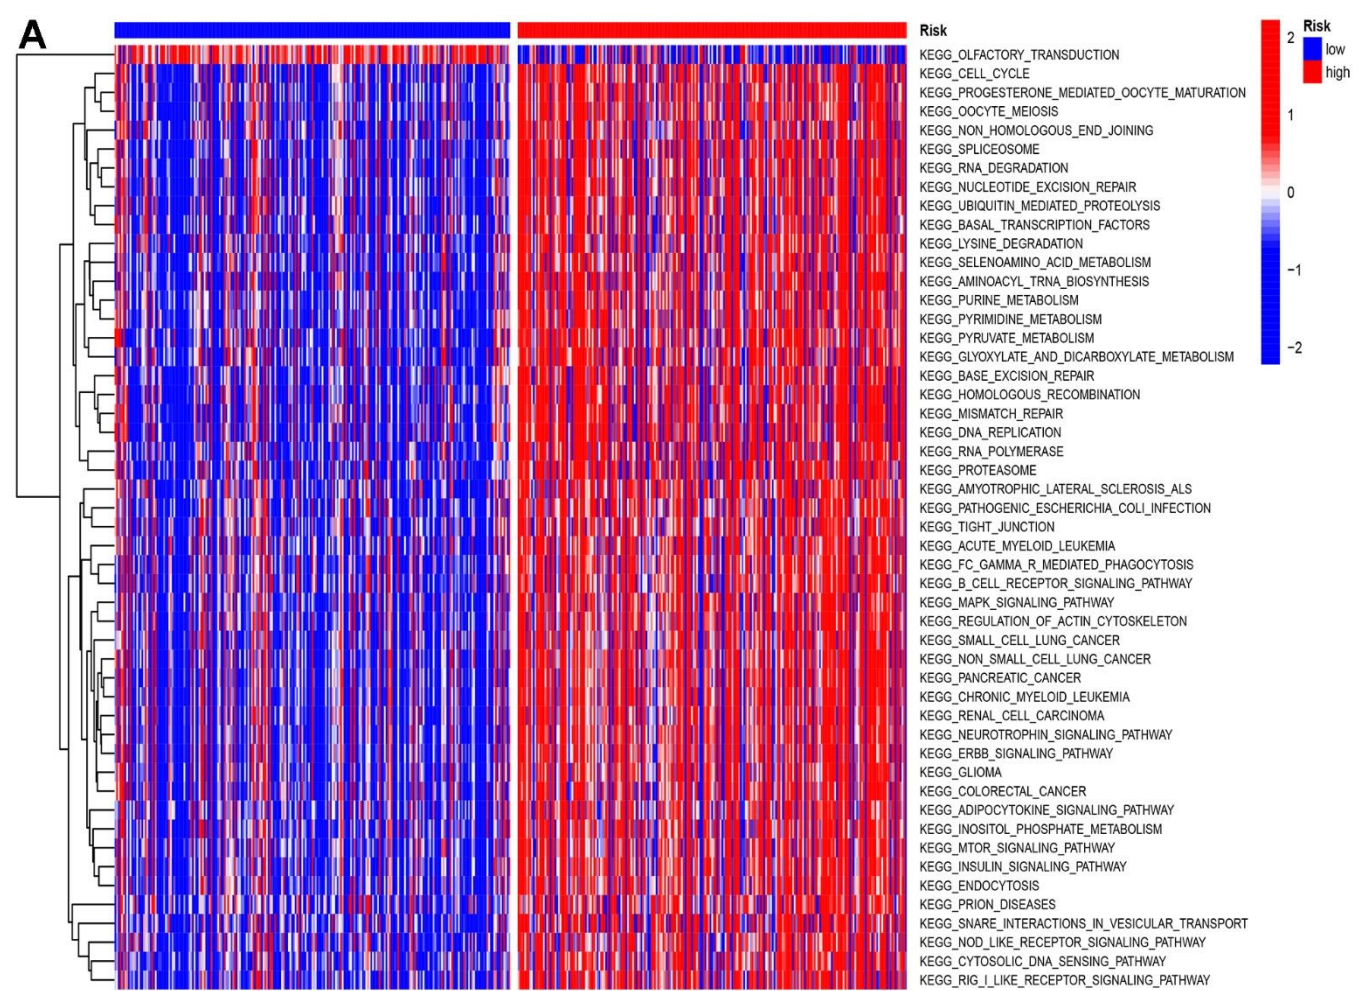

**Supplementary Figure 1. GSEA analysis.** (A) GSEA of two different risk groups based on the KEGG pathway.

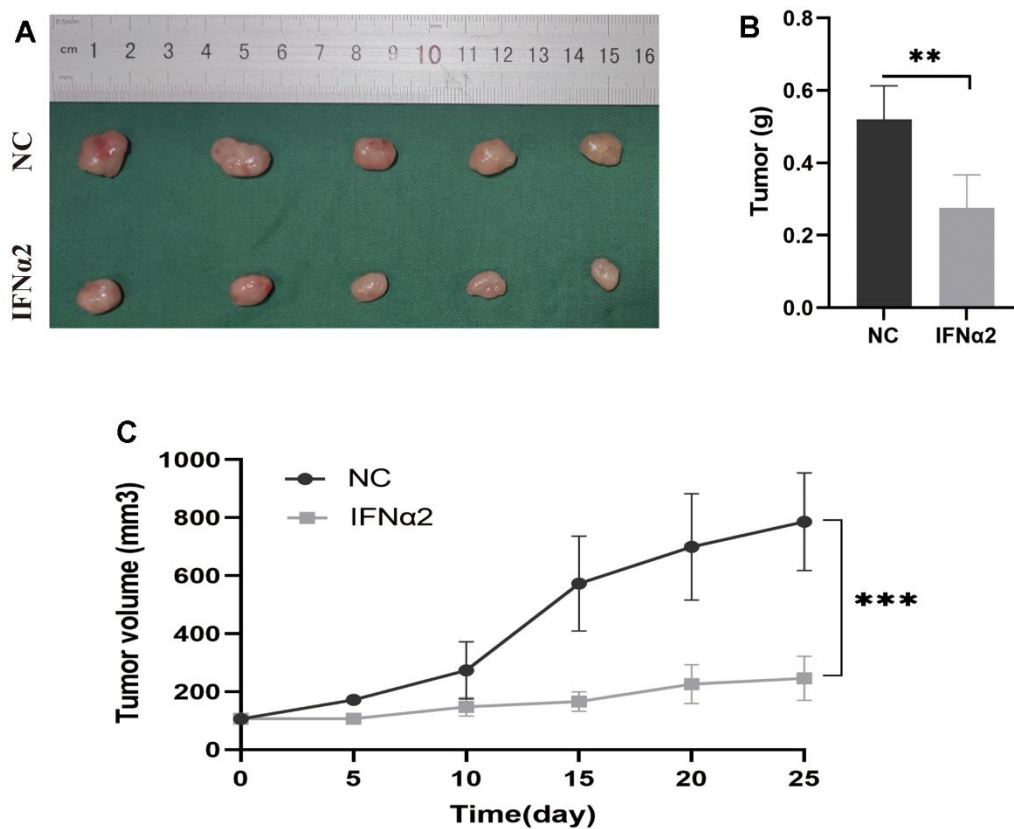

**Supplementary Figure 2. IFNA2 inhibited EC cell proliferation *in vivo*.** (A) Tumor photos of different groups of nude mice in the NC group and IFNA2 treatment (10000U/2 days) group. (B, C) Average body weight (B) and tumor size (C) were used to observe the tumors. \*\*  $p < 0.01$  and \*\*\*  $p < 0.001$ .
